# Supplementary material for: Clinical and Functional Characterization of a Missense ELF2 Variant in a CANVAS Family
Source: PubMed Central journal article supplement (PMC5876245; doi:10.3389/fgene.2018.00085), 2018-03-23
Supplement: Table_1.pdf [file Table_1.pdf]

## *Supplementary Material*

### **Clinical and functional characterization of a missense ELF2 variant in a CANVAS family**

**Hena Ahmad.MD<sup>1</sup>. Teresa Requena. PhD<sup>2</sup>. Lidia Frejo<sup>2</sup>. Marien Cobo. PhD<sup>3</sup>. Alvaro Gallego-Martinez<sup>2</sup>. Francisco Martin. PhD<sup>3</sup>. Jose A Lopez-Escamez. PhD. MD<sup>2,4</sup>. \* Adolfo M. Bronstein. PhD.MD<sup>1</sup>. \***

#### **Correspondence:**

[a.bronstein@imperial.ac.uk](mailto:a.bronstein@imperial.ac.uk)

[antonio.lopezescamez@genyo.es](mailto:antonio.lopezescamez@genyo.es)

#### **Supplementary methods**

qPCR. Quantitative RT-PCR (qPCR) was performed with Sybergreen kit and ABI 7900 HT Fast Real-Time PCR Systems (Life Technologies) following commercial instructions (40 cycles standard conditions) and the following primers Fw--> GTGGAGGTGTCAACTGAAGAGTC and Rv-->TACCTAACTCAGGAGACCCATTG that cover partially exon 5 and 6 that are expressed in all the isoforms. Hypoxanthine phosphoribosyltransferase 1 (HPRT-1) was used as a house keeping gene. Technical triplicate was performed per each sample was run in technical triplicate to reduce experimental errors. The fold change for each gene results were obtain analysed using the comparative CT method

Western-blot. Protein concentration was determined by Bradford protein assay (Bio-Rad. 15 µg of total proteins were separated for molecular weight in a poliacrilamyde gel (130V, 1h 30min) and transferred to a Trans-Blot® Turbo™ Midi PVDF membrane by Trans-Blot® Turbo™ Transfer System (BioRad). The membrane was incubated with primary antibodies overnight at 4°C. A mouse monoclonal antibody against ATXN2 (BD Biosciences, #611378, 1:1000), a rabbit polyclonal antibody against Elf2 (Sigma-Aldrich, #HPA006057-100UL, 1:1000) and a chicken polyclonal antibody against GAPDH (EMD Millipore, #AB2302, 1:3000) were used. Then the membrane was incubated with secondary antibodies for 1h at room temperature. A goat anti-mouse (R&D Systems, #HAF007, 1:6000), a goat anti-rabbit (R&D Systems, #HAF008, 1:3000) and a rabbit anti-chicken (Sigma-Aldrich, #A9046-1ML, 1:10000) were used respectively. We developed the membrane using Clarity™ Western ECL Substrate (Bio-rad) and images were obtained by the Image Quant LAS4000 (GE Healthcare Life Science). We used ImageJ software (NIH Image) for protein quantification.

Immunocytochemistry. For lipid droplets experiments, cells were stained with 4 µg/mL Nile red in PBS (made from 1 mg/mL Nile red stock solution in acetone, Sigma-Aldrich) for 25 minutes under

dark conditions to measure the number and size of lipid droplets. After Nile red staining, cells were fixed with 4% paraformaldehyde fixative solution for 20 min, and then washed with 0.1M Glycine (Sigma-Aldrich) in 1x PBS (Sigma-Aldrich). Then, samples were incubated with 0.3% Triton TM X-100 (Sigma-Aldrich) in 1x PBS for 30 min at RT and washed with 1x PBS twice. Blocking was performed during 30 min in 1x PBS with 3% bovine serum albumin (BSA, Sigma-Aldrich). Anti-ELF2 (1:500) was used as a primary antibody and cells were incubated overnight in blocking solution (BSA 3%) and visualized with Alexa-633-conjugated goat anti-rabbit (1:500).

Cells were mounted in SlowFade® mounting medium with DAPI (Life technologies) for nuclei staining. A laser scanning confocal microscope LSM 710 (Carl Zeiss) was used for image collection and the Zeiss browser software program ZEN (black edition) was used to acquire and export the data. All images were taken with defined laser intensity settings on the microscope. Final image processing and labeling were performed with the image analysis program ImageJ.

### Supplementary references

1. Oettgen P, Akbarali Y, Boltax J, Best J, Kunsch C, Libermann TA. Characterization of NERF, a novel transcription factor related to the Ets factor ELF-1. *Mol Cell Biol* 1996 Sep;16(9):5091–106.
2. Pan, X., Wilson, M., McConville, C., Brundler, M.A., Arvanitis, T.N., Shockcor, J.P., Griffin, J.L., Kauppinen, R.A. and Peet, A.C. (2012) The lipid composition of isolated cytoplasmic lipid droplets from a human cancer cell line, BE(2)M17. *Mol bioSystems* 2012, 8, 1694-1700.
3. Pan, X., Wilson, M., McConville, C., Arvanitis, T.N., Kauppinen, R.A. and Peet, A.C. (2012) The size of cytoplasmic lipid droplets varies between tumour cell lines. *MAGMA* 2012 Dec;25(6):479-85. doi: 10.1007/s10334-012-0315-x.

## *Supplementary Tables S1 and S2*

**Supplementary Table 1.** Single nucleotide variants with coverage >30X, MAF<0.001 and LOD > 0.5 found in the family with CANVAS. NFE, Non-Finnish European.

| POS            | GENE     | dbSNP       | Location | Function      | MAF    |                       |                       | LOD score |
|----------------|----------|-------------|----------|---------------|--------|-----------------------|-----------------------|-----------|
|                |          |             |          |               | 1000G  | GnomAD                | GnomAD NFE            |           |
| chr1:38281098  | MTF1     | rs534357571 | exonic   | nonsynonymous | 0.0004 | 0.0002                | 4.5x10 <sup>-05</sup> | 10.616    |
| chr1:41608664  | SCMH1    | rs150272371 | exonic   | synonymous    | 0.0002 | 0.0002                | 0.0004                | 0.8442    |
| chr1:47746033  | STIL     |             | exonic   | synonymous    |        |                       |                       | 0.8242    |
| chr4:140058846 | ELF2     | rs747574524 | exonic   | nonsynonymous | 0      | 0                     | 0                     | 0.5701    |
| chr7:137776458 | AKR1D1   | rs150580784 | intronic |               | 0.0008 | 0                     | 0                     | 0.5402    |
| chr11:60640710 | ZP1      |             | exonic   | synonymous    |        |                       |                       | 0.7308    |
| chr11:61108877 | DAK      | rs370562273 | intronic |               | 0      | 0.0002                | 0.0004                | 0.5605    |
| chr19:9578460  | ZNF560   | rs146030501 | exonic   | nonsynonymous | 0.0002 | 0.0004                | 0.0009                | 0.7096    |
| chr19:9960233  | PIN1     | rs370315019 | 3' UTR   |               | 0      | 6.9x10 <sup>-05</sup> | 0.0001                | 0.6966    |
| chr19:12921075 | RNASEH2A | rs373831458 | intronic |               | 0.0006 | 0                     | 0                     | 0.5743    |

**Supplementary Table 2. Final list of candidate variants.** This list resulted after excluding non-coding (intronic, UTR3) and synonymous variants. Intronic variants were excluded after confirming that they did not generated a novel splice-site. Remaining variants were prioritized according to the combined score of four algorithms (Pathogenic variant –PAVAR- score, Exomizer, VAAST+Phevor and CADD). PAVAR score ranges from 0 to 7 and it was calculated as the sum of the tools that considered a given variant as pathogenic by using the following tools: SIFT, Polyphen2, Mutation Taster, PhyloP, GERP++, Grantham and PhastCons. Positions are related to the “Genome Reference Consortium GRCh37”.

| Gene   | Pos.           | rsID        | SIFT  | Polyphen2 | Single Scores   |        |        |          |           | Combined scores |          |               |      |
|--------|----------------|-------------|-------|-----------|-----------------|--------|--------|----------|-----------|-----------------|----------|---------------|------|
|        |                |             |       |           | Mutation Taster | PhyloP | GERP++ | Grantham | PhastCons | PAVAR           | Exomiser | VAAST+ Phevor | CADD |
| ELF2   | chr4:140058846 | rs747574524 | 0.066 | 0.996     | 1.000           | 4.175  | 5.17   | 58       | 1.000     | 5               | 0        | 6.17          | 23.3 |
| MTF1   | chr1:38281098  | rs534357571 | 0.57  | 0.0       | 0.534           | 2.347  | 5.03   | 27       | 1.000     | 3               | 0.043    | 5.45          | 0.01 |
| ZNF560 | chr19:9578460  | rs146030501 | 0.63  | 0.028     | 1.000           | -3.915 | -3.74  | 98       | 0.000     | 2               | 0        | 4,2           | 3.3  |
